# Supplementary material
Source: PubMed Central journal article supplement (PMC2736773)
Supplement: ASN.2008101110_1.pdf [file ASN.2008101110_1.pdf]

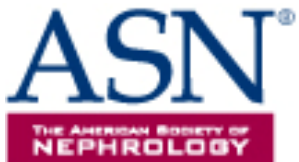

1725 I Street NW • Suite 510 • Washington, DC 20006  
Tel 202-659-0599 • Fax 202-659-0709 • [www.asn-online.org](http://www.asn-online.org)

**Contact:** Shari Leventhal: 202-416-0658, [sleventhal@asn-online.org](mailto:sleventhal@asn-online.org)

## **MARS AND VENUS: SHORT-AND LONG-TERM SUCCESS OF MALE TO FEMALE KIDNEY TRANSPLANTS**

*Proteins on Male Cells May Elicit Immune Response in Female Kidney Transplant Recipients*

**Washington, DC (July 29, 2009)** — Female recipients of kidneys from deceased male donors demonstrate an increased risk of allograft failure in the first year after transplant, but show no increased risk after ten years, according to a study appearing in an upcoming issue of the *Journal of the American Society of Nephrology* (JASN). The study authors note that proteins on male donor cells may affect the short term success of kidney transplants in women.

Joseph Kim, MD (Toronto General Hospital and the University of Toronto, Canada) and John Gill, MD (St. Paul's Hospital and the University of British Columbia, Canada) studied information on all adult recipients of deceased-donor kidney transplants from 1990 through 2004 in the United States Renal Data System (a system that collects, analyzes, and distributes information about end-stage renal disease in the United States). 117,877 patients were followed for at least one year post transplant. Of these, 16,135 experienced kidney graft failure and 6,878 died within the year. 97,906 patients had functioning grafts at 1-year and were followed for up to 10 years post-transplant. Of these, 35,084 graft failures and 22,566 deaths occurred.

The results of this analysis indicate that H-Y antigens, derived from the male chromosome and not found in women, may elicit an immune response in women who receive transplants from deceased male donors. Compared with all other sex combinations, female recipients of male donor kidneys had a 12% increased risk for transplant failure at one year but no excess risk at 10 years. Women who received male donor kidneys also exhibited a similar increased risk of death in the first year, but no increased risk at 10 years.

Dr. Kim noted that there are numerous factors that contribute to the success of kidney transplants and that transplanting male kidneys into female recipients often produces excellent outcomes. According to the authors, many important factors should be taken into account when considering transplant options, and “future research should examine the potential mechanisms underlying the H-Y effect in order to better

**MORE**

understand the specific role of minor histocompatibility antigens in determining kidney allograft outcomes.”

The authors report no financial disclosures.

The article, entitled “H-Y Incompatibility Predicts Short-Term Outcomes for Kidney Transplant Recipients,” is available online at <http://jasn.asnjournals.org/>, doi 10.1681/ASN.2008101110.

The American Society of Nephrology (ASN) does not offer medical advice. All content in ASN publications is for informational purposes only, and is not intended to cover all possible uses, directions, precautions, drug interactions, or adverse effects. This content should not be used during a medical emergency or for the diagnosis or treatment of any medical condition. Please consult your doctor or other qualified health care provider if you have any questions about a medical condition, or before taking any drug, changing your diet or commencing or discontinuing any course of treatment. Do not ignore or delay obtaining professional medical advice because of information accessed through ASN. Call 911 or your doctor for all medical emergencies.

Founded in 1966, ASN is the world’s largest professional society devoted to the study of kidney disease. Comprised of 11,000 physicians and scientists, ASN continues to promote expert patient care, to advance medical research, and to educate the renal community. ASN also informs policymakers about issues of importance to kidney doctors and their patients. ASN funds research, and through its world-renowned meetings and first-class publications, disseminates information and educational tools that empower physicians.

###
